# Supplementary material
Source: HighWire-hosted journal article supplement (https://bmjopen.bmj.com/content/11/3/e043666)
Supplement: inline-supplementary-material-2 [file inline-supplementary-material-2.pdf]

Study: Effisayil™ 1  
IRB/IECs approvals

| Country       | Institutional Review Boards/Medical Ethical Committees                                                                                                                                                             |
|---------------|--------------------------------------------------------------------------------------------------------------------------------------------------------------------------------------------------------------------|
| United States | Alpha IRB Suite C #497 1001<br>Avenida Pico San Clemente<br>California 92673 United States                                                                                                                         |
|               | Western Institutional Review<br>Board Suite 120 1019 39th<br>Avenue Puyallup Washington<br>98374 United States                                                                                                     |
|               | University of Miami Institutional<br>Review Board Suite 1200A<br>1400 NW 10th Avenue Miami<br>Florida 33136 United States                                                                                          |
|               | University of Missouri -<br>Columbia Health Services IRB<br>482 McReynolds Hall Columbia<br>Missouri 65212 United States                                                                                           |
|               | Icahn School of Medicine at<br>Mount Sinai Program for the<br>Protection of Human Subjects<br>Box 1081 One Gustave L. Levy<br>Place New York New York<br>10029 United States                                       |
| China         | 2nd Affiliated Hosp Zhejiang<br>University College of Medical<br>The Second Affiliated Hospital<br>of Zhejiang University School of<br>Medicine No. 88, Jiefang road<br>Hangzhou Zhejiang Province<br>310009 China |
|               | Shanghai Skin Disease Hospital<br>No 1278, Baode Road, Jingan<br>District, Shanghai, 200000, China<br>Shanghai Shanghai Municipality<br>200000 China                                                               |
|               | Shanghai Huashan Hospital No.<br>12, Urumqi Road, Shanghai.<br>200040 Shanghai Shanghai<br>Municipality 200040 China                                                                                               |
|               | Tianjin Medical University<br>General Hospital No.154,<br>Anshan Road, Heping District,<br>Tianjin Tianjin Migration Data<br>30052 China                                                                           |
|               | The First Hospital of China<br>Medical University 155<br>Nanjing Street, Heping District<br>Shenyang Liaoning Province<br>110001 China                                                                             |
|               | First Affiliated Hospital of<br>Kunming Medical University<br>Neurology Department No.295<br>Xichang Road, Kunming<br>Kunming Yunnan Province<br>650032 China                                                      |
|               | Peking Union Medical College<br>Hospital No.41 Damucang                                                                                                                                                            |

Study: Effisayil™ 1  
IRB/IECs approvals

|                |                                                                                                                                                                                                                    |
|----------------|--------------------------------------------------------------------------------------------------------------------------------------------------------------------------------------------------------------------|
|                | Hutong, Xicheng District/ No. 1<br>Shuaifuyuan, Dongcheng<br>District Beijing Beijing<br>Municipality 100032 China                                                                                                 |
|                | 2nd Affiliated Hosp Zhejiang<br>University College of Medical<br>The Second Affiliated Hospital<br>of Zhejiang University School of<br>Medicine No. 88, Jiefang road<br>Hangzhou Zhejiang Province<br>310009 China |
| <b>France</b>  | CCP Sud-Méditerranée IV<br>Hôpital Saint-Eloi Montpellier<br>34295 France                                                                                                                                          |
| <b>Germany</b> | Ethik-Kommission der<br>Medizinischen Fakultät der<br>Universität Duisburg-Essen<br>Robert-Koch-Straße 9-11 Essen<br>45147 Germany                                                                                 |
| <b>Japan</b>   | The IRB of Nagoya City<br>University Hospital 1<br>Kawasumi, Mizuho-cho,<br>Mizuho-ku Aichi, Nagoya<br>467-8602 Japan                                                                                              |
|                | The IRB of Fukuoka University<br>Hospital 7-45-1 Nanakuma,<br>Jonan-ku Fukuoka, Fukuoka<br>814-0180 Japan                                                                                                          |
|                | The IRB of Asahikawa Medical<br>University Hospital 1-1-1,<br>Higashi2jo, Midorigaoka<br>Hokkaido, Asahikawa<br>078-8510 Japan                                                                                     |
|                | The IRB of Tokyo Medical<br>University Ibaraki Medical<br>Centre 3-20-1, Chuo,<br>Ami-machi Ibaraki, Inashiki-gun<br>300-0395 Japan                                                                                |
|                | The IRB of Mie University<br>Hospital 2-174, Edobashi Mie,<br>Tsu 514-8507 Japan                                                                                                                                   |
|                | The Conjoint IRB of All Tohoku<br>Clinical Trial Review and Audit<br>Organisation 1-6-10, Kamisugi,<br>Aoba-ku Miyagi, Sendai<br>980-0011 Japan                                                                    |
|                | The IRB of Shinshu University<br>Hospital 3-1-1 Asahi Nagano,<br>Matsumoto 390-8621 Japan                                                                                                                          |
|                | The IRB of Kindai University<br>Hospital 377-2 Onohigashi Japan                                                                                                                                                    |
|                | The IRB of Tokyo Medical<br>University Hachioji Medical<br>Centre 1163, Tatemachi Tokyo,<br>Hachioji 193-0998 Japan                                                                                                |

Study: Effisayil™ 1  
IRB/IECs approvals

|                    |                                                                                                                                                                                                      |
|--------------------|------------------------------------------------------------------------------------------------------------------------------------------------------------------------------------------------------|
|                    | The Conjoint IRB of Nihon University Hospitals 30-1, Oyaguchi kami-cho Tokyo, Itabashi-ku 173-8610 Japan                                                                                             |
|                    | The IRB of Tokyo Medical University Hospital 6-7-1 Nishishinjuku Tokyo, Shinjuku-ku 160-0023 Japan                                                                                                   |
| <b>Korea</b>       | Seoul National University Hospital Institutional Review Board 101 Daehak-ro Jongno-gu Seoul 03080 Korea, Republic of                                                                                 |
|                    | Institutional Review Board Severance Hospital, Yonsei University Health System, Institutional Review Board 50-1 Yonsei-ro, Seodaemun-gu Seoul 03722 Korea, Republic of                               |
| <b>Malaysia</b>    | Medical Research & Ethics Committee d/a Kompleks Institut Kesihatan Negara Blok A, No 1, Jalan Setia Murni U13/52 Seksyen U 13, Bandar Setia Alam 40170 Shah Alam, Selangor Shah Alam 40170 Malaysia |
| <b>Singapore</b>   | NHG Domain Specific Review Board 3 Fusionopolis Link #03-08 Nexus@One-North Singapore 138543 Singapore                                                                                               |
| <b>Switzerland</b> | Commission cantonale (VD) d'ethique de la recherche sur l'entre humain Chairman: Prof. Dr. Med. Patrik Francioli Avenue de Chailly 23 Lausanne 1012 Switzerland                                      |
| <b>Taiwan</b>      | Chang Gung Medical Foundation 199 Tung Hwa North Road Taipei Migration Data 10507 Taiwan                                                                                                             |
| <b>Thailand</b>    | Ethics committee/IRB of the Institute of Dermatology Institute of Dermatology, 420/7 Rajavithi Road Bangkok 10400 Bangkok 10400 Thailand                                                             |
|                    | Central Research Ethics Committee Building 2., 5th Fl, The National Research Council of Thailand Building, 196 Ladyao, Catuchak, Bangkok 10900 Thailand                                              |
|                    | Office of The Committee for Research Faculty of Medicine Ramathibodi Hospital Mahidol University 270 Rama 6 Rd. Phayatai Ratchathewi, Bangkok 10400 Thailand                                         |
| <b>Tunisia</b>     | Personal protection Committee -South Ethics Committee                                                                                                                                                |

Study: Effisayil™ 1  
IRB/IECs approvals

|  |                                                                                |
|--|--------------------------------------------------------------------------------|
|  | Higher Institute of Nursing science of Sfax-Avenue Majida BOULILA-Sfax-Tunisia |
|--|--------------------------------------------------------------------------------|
